# Supplementary material for: Toxic effects of zinc oxide nanoparticles combined with vitamin C and casein phosphopeptides on gastric epithelium cells and the intestinal absorption of mice
Source: Royal Society of Chemistry journal article supplement (doi:10.1039/c8ra03693d), 2018-01-01
Supplement: c8ra03693d1.pdf [file c8ra03693d1.pdf]

## Supporting Information

### Toxic effect of zinc oxide nanoparticles combined with vitamin C and caseinphosphopeptides on gastric epithelium cells and intestinal absorption of mice

Tianjiao Gu<sup>a</sup>, Chenjie Yao<sup>a</sup>, Kangkang Zhang<sup>a</sup>, Chenchen Li<sup>a</sup>, Lin Ding<sup>a</sup>, Yanan Huang<sup>a</sup>, Minghong Wu<sup>\*b</sup>, Yanli Wang<sup>\*a</sup>

<sup>a</sup>Institute of Nanochemistry and Nanobiology, Shanghai University, Shanghai 200444, P.R China.

<sup>b</sup>School of Environmental and Chemical Engineering, Shanghai University, Shanghai 200444, P.R. China. \*E-mail: mhwu@shu.edu.cn; wangyanli@staff.shu.edu.cn

### Cytotoxicity Evaluation

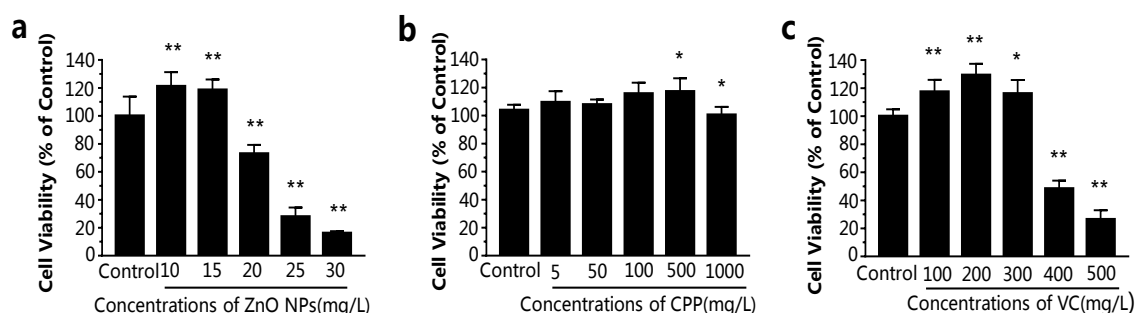

Fig. S 1 Cytotoxicity evaluation of ZnO NPs, CPP, Vc treatment in GES-1 cells for 24 h. (a) Different concentrations ( $\text{mg L}^{-1}$ ) of ZnO NPs; (b) Different concentrations ( $\text{mg L}^{-1}$ ) of CPP; (c) Different concentrations ( $\text{mg L}^{-1}$ ) of Vc. Data are presented as the mean  $\pm$  S.D. \* $P < 0.05$  compared with the control group, \*\* $P < 0.01$  compared with the control group.

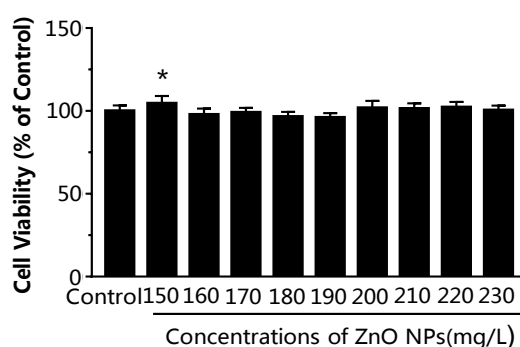

Fig. S 2 Cell viability analysis of GES-1 cells with different concentrations ( $\text{mg L}^{-1}$ ) of ZnO NPs for 2 h. Data are presented as the mean  $\pm$  S.D. \* $P < 0.05$  compared with the control group.

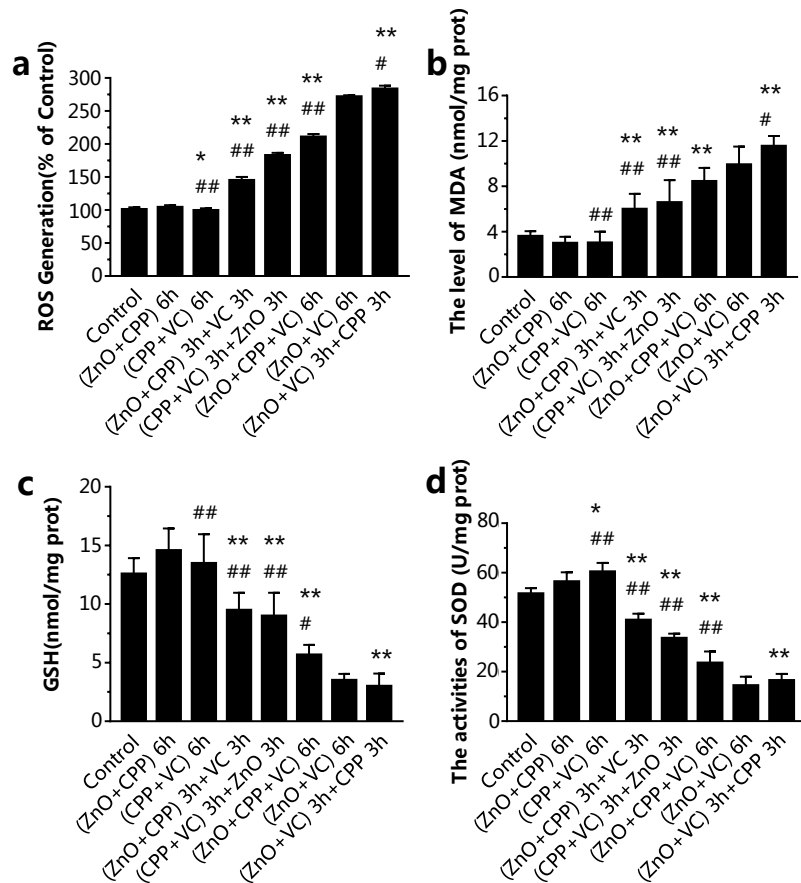

Fig. S 3 Intracellular redox production after incubation with ZnO NPs, CPP and Vc in different systems treatment for 6 h. (a) ROS generation; (b) MDA concentration; (c) GSH concentration; (d) SOD activity. Data are presented as the mean  $\pm$  S.D. \* $P$ <0.05 compared with the group of ZnO NPs plus CPP, \*\* $P$ <0.01 compared with the group of ZnO NPs plus CPP, # $p$ <0.05 compared with the group of ZnO NPs plus VC, ## $p$ <0.01 compared with the group of ZnO NPs plus VC.

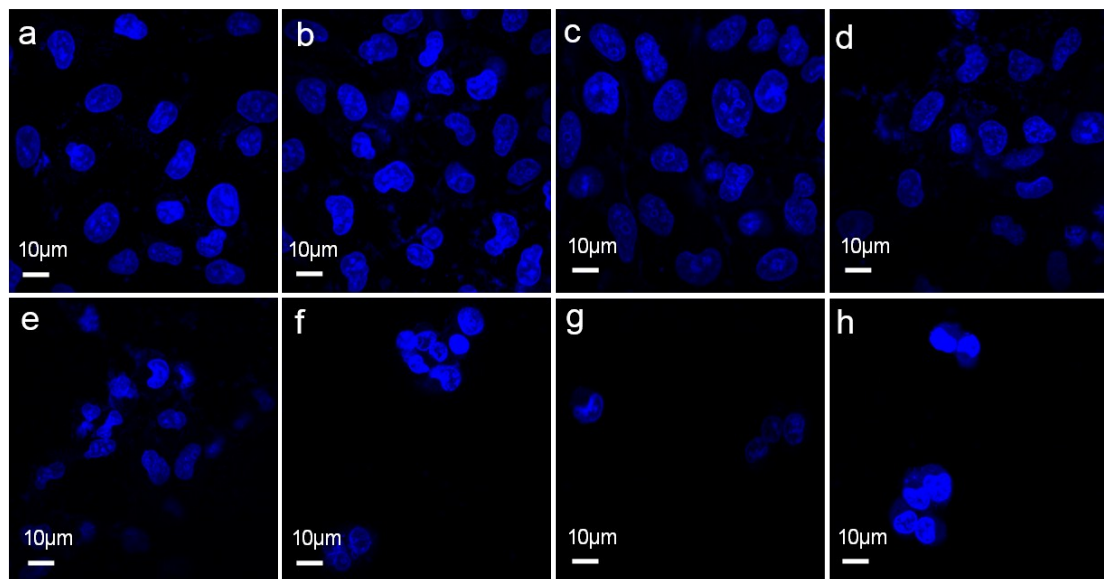

Fig. S 4 Observation of the morphological changes of GES-1 after co-incubation in 120 mg L<sup>-1</sup> ZnO NPs, 500 mg L<sup>-1</sup> CPP, 300 mg L<sup>-1</sup> VC with different systems for 6 h. The cell nuclei are stained with DAPI. (a) The control cells; (b) The cells treated with (ZnO+CPP) 6 h; (c) The cells treated with (CPP+VC) 6 h; (d) The cells treated with (ZnO+CPP) 3 h + VC 3 h; (e) The cells treated with (CPP+VC) 3 h + ZnO 3 h; (f) The cells treated with (ZnO+CPP+VC) 6 h; (g) The cells treated with (ZnO+VC) 6 h; (h) The cells treated with (ZnO+VC) 3 h + CPP 3 h.

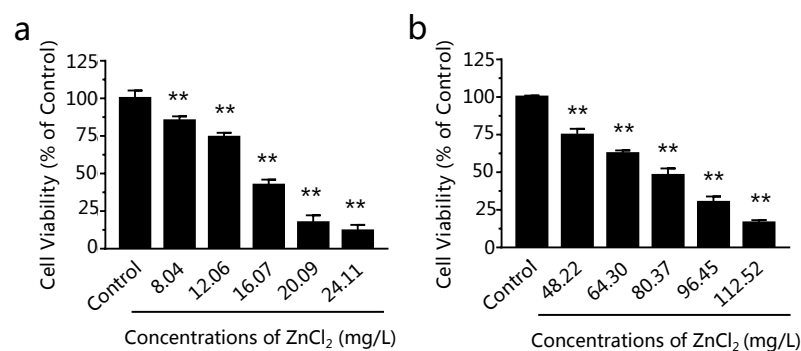

Fig. S 5 Cell viability analysis of GES-1 cells with different concentrations (mg L<sup>-1</sup>) of ZnCl<sub>2</sub>. (a) for 24 h; (b) for 6 h. Data are presented as the mean  $\pm$ S.D. \* $P$ <0.05 compared with the control group., \*\* $P$ <0.01 compared with the control group.

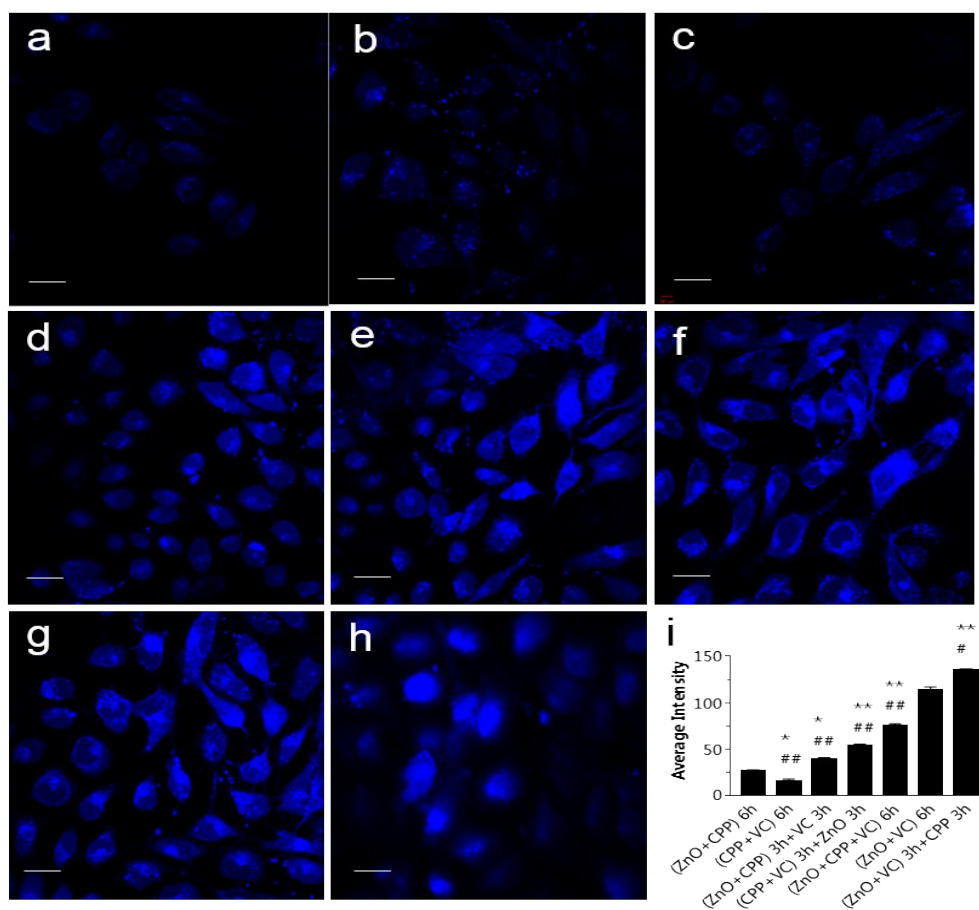

Fig. S 6 Observation of the morphological changes of GES-1 after co-incubation in 120 mg L<sup>-1</sup> ZnO NPs, 500 mg L<sup>-1</sup> CPP, 300 mg L<sup>-1</sup> VC with different systems for 6 h stained by TSQ. Each image scale is 100  $\mu$ m. (a) The control cells; (b) The cells treated with (ZnO+CPP) 6 h; (c) The cells treated with (CPP+VC) 6 h; (d) The cells treated with (ZnO+CPP) 3 h + VC 3 h; (e) The cells treated with (CPP+VC) 3 h + ZnO 3 h; (f) The cells treated with (ZnO+CPP+VC) 6 h; (g) The cells treated with (ZnO+VC) 6 h; (h) The cells treated with (ZnO+VC) 3 h + CPP 3 h; (i) Analysis of the average fluorescence intensity of zinc ions in GES-1 cells after incubation with different systems for 6 h. \* $P$ <0.05 compared with the group of ZnO NPs plus CPP, \*\* $P$ <0.01 compared with the group of ZnO NPs plus CPP, \*\*\* $P$ <0.001 compared with the group of ZnO NPs plus VC, # $P$ <0.05 compared with the group of ZnO NPs plus VC, ## $P$ <0.01 compared with the group of ZnO NPs plus VC.

## The process of the study

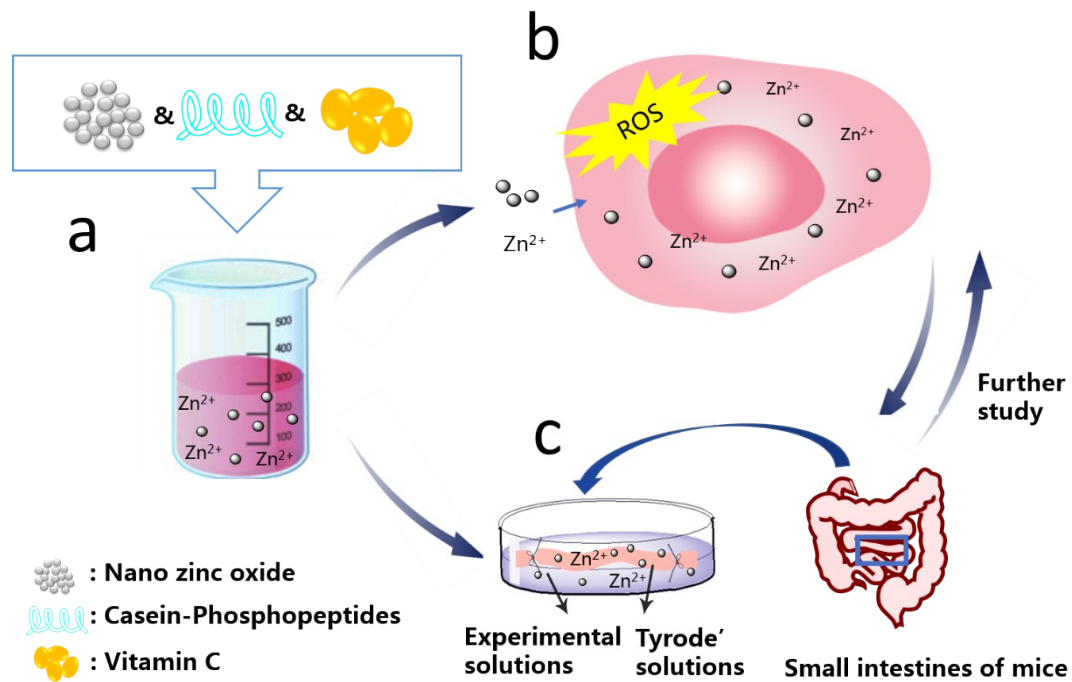

Fig. S 7 The whole process of this study. (a) The dissolved Zn<sup>2+</sup> from ZnO NPs in different combined groups plays the key role of the combined toxic effect. (b) Cell apoptosis and oxide stress on GES-1 cells induced by the combined groups of ZnO NPs, VC and CPP. (c) Zn<sup>2+</sup> absorption of mice small intestine with the everted gut sac model.
